# Supplementary material for: Reaction induced morphology changes of tetracene and pentacene surfaces
Source: Royal Society of Chemistry journal article supplement (doi:10.1039/c9ra05682c), 2019-01-01
Supplement: c9ra05682c1.pdf [file c9ra05682c1.pdf]

## Electronic Supplementary Information

# Reaction Induced Morphology Changes of Tetracene and Pentacene Surfaces.

Feifei Li, Jacob W. Ciszek\*

Department of Chemistry and Biochemistry, Loyola University Chicago, 1032 West Sheridan Road, Chicago, Illinois 60660, United States

### Table of Contents

|                                                                                                                                                       |        |
|-------------------------------------------------------------------------------------------------------------------------------------------------------|--------|
| <b>Fig. S1.</b> Normalized PM-IRRAS Spectra of Different Reaction Times for Tetracene Exposed to Maleic Anhydride                                     | ...ii  |
| <b>Fig. S2.</b> SEM Images of Extended Maleic Anhydride Reactions.                                                                                    | ...ii  |
| <b>Fig. S3.</b> EDX Mapping of Tetracene Film Completely Reacted with Maleic Anhydride.                                                               | ...iii |
| <b>Fig. S4.</b> SEM images of tetracene thin films reacted with maleic anhydride at 50 °C, 2.5 h.                                                     | ...iii |
| <b>Fig. S5.</b> EDX Spectra and Percentage Oxygen for a Tetracene Thin Film Reacted for 8 h with Maleic Anhydride imaged at 1 keV.                    | ...iv  |
| <b>Fig. S6.</b> Monte Carlo Simulated EDX Data of 2 nm Maleic Anhydride-Tetracene Adduct on 98 nm Tetracene Thin Film.                                | ...v   |
| <b>Fig. S7.</b> EDX and Percentage Oxygen for Tetracene Reacted 36 h with Maleic Anhydride Imaged at 1-5 keV.                                         | ...v   |
| <b>Fig. S8.</b> EDX and Percentage Oxygen for 100 nm Tetracene Thin Film under 1-5 kV and 45 h Reaction with Maleic Anhydride Adduct Imaged at 1 keV. | ...vi  |
| <b>Fig. S9.</b> PM-IRRAS Spectra of a 50 nm Pentacene Thin Film reacted Maleic Anhydride.                                                             | ...vii |

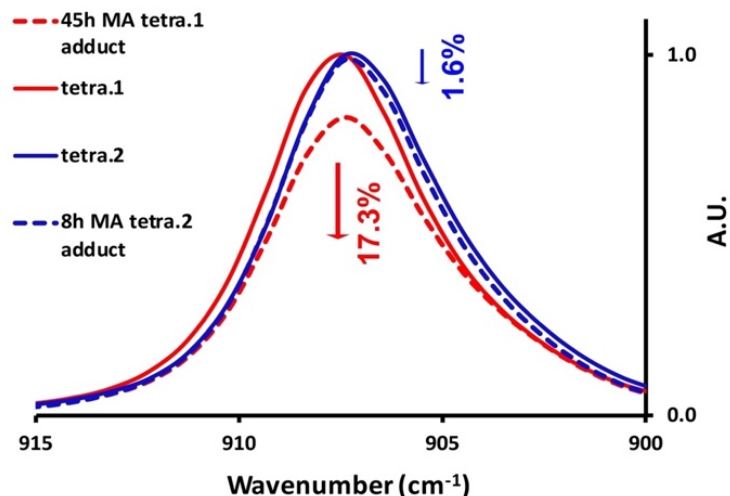

**Fig. S1.** PM-IRRAS spectra of tetracene films reacted with maleic anhydride for time intervals. The colored lines denote the following: 8 h reaction (blue dashed) and pristine tetracene (blue solid), 45 h reaction (red dashed) and pristine tetracene (red solid). The intensity (y-axis) is a normalized such that the pristine samples have an absorbance of 1.

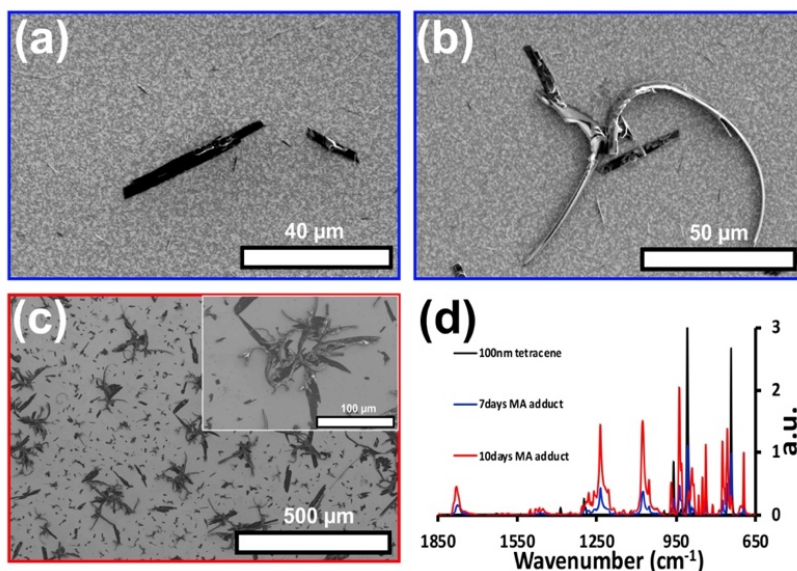

**Fig. S2.** SEM images 100 nm tetracene thin films reacted with maleic anhydride for extended periods of time. (a-b) 40 °C, 7 d; (c) 40 °C, 10 d; the inset is higher magnification of the same surface. (d) Corresponding PM-IRRAS spectra. The colors denote the following: 100 nm pure tetracene thin film (black), 40 °C, 7 d reaction with maleic anhydride (blue), 40 °C, 10 d reaction with maleic anhydride adduct (red).

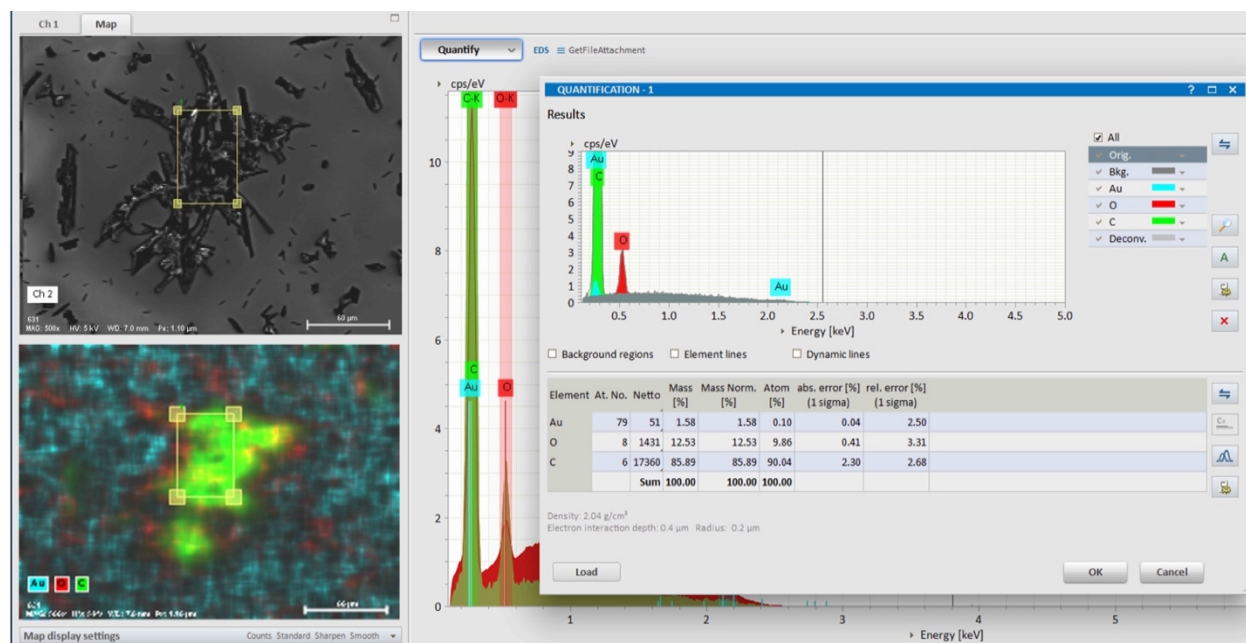

**Fig. S3.** EDX spectra, elemental map, and atomic composition. Sample is a tetracene film that has been completely reacted with maleic anhydride adduct imaged at 5 keV electron energy. Oxygen percentage is 9.9%, close to the 12% predicted for  $C_{22}H_{14}O_3$ .

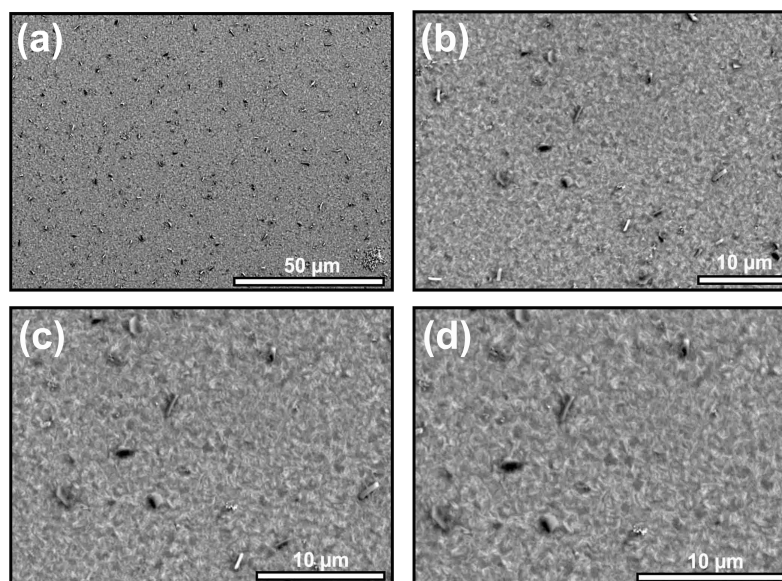

**Fig. S4.** (a-d) Different magnification SEM images of a 100 nm tetracene thin film reacted with maleic anhydride at 50 °C for 2.5 h. SEM image was taken at 5 keV electron energy.

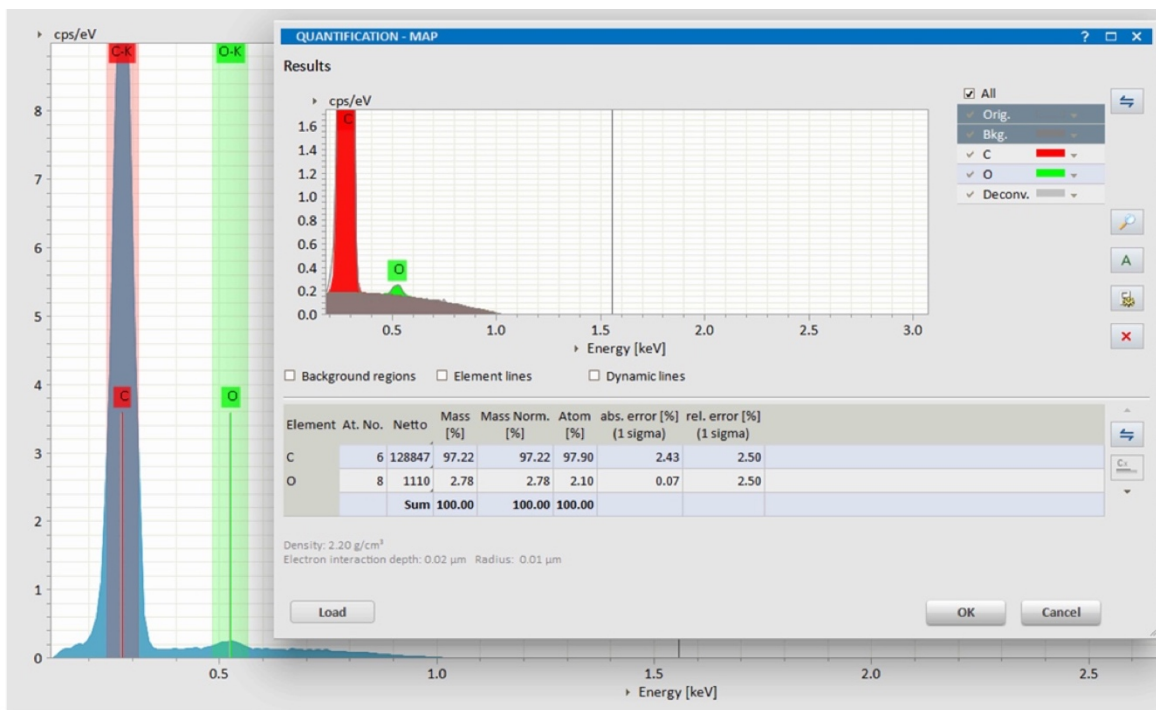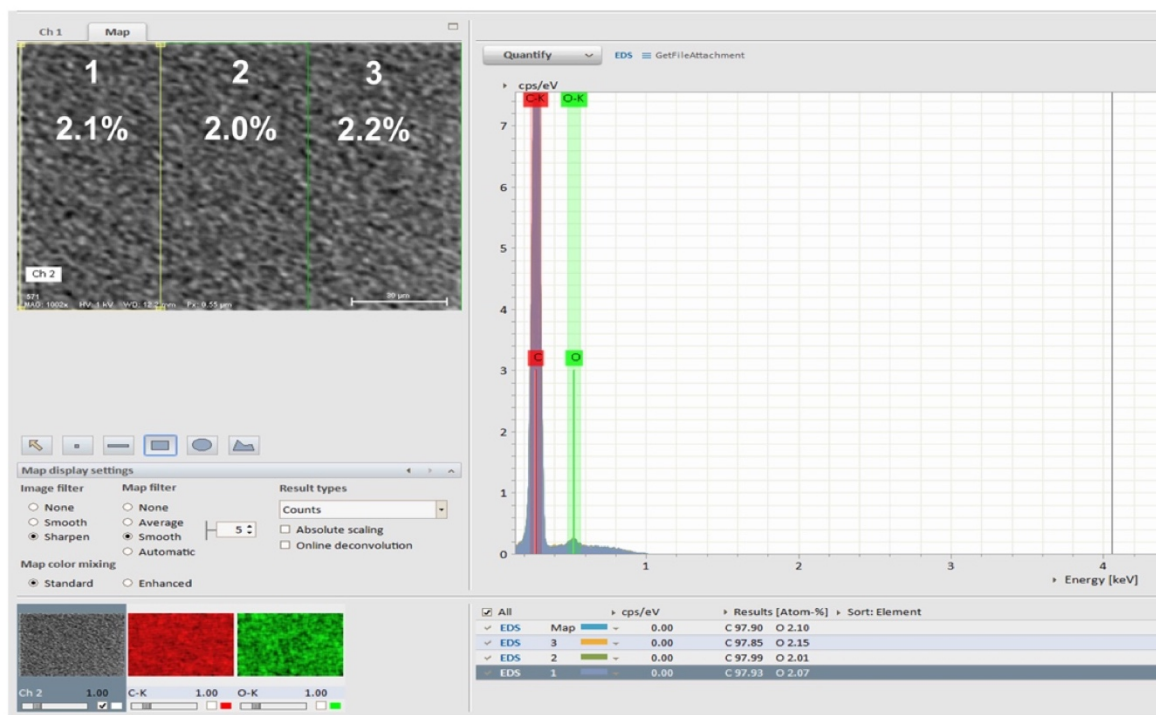

**Fig. S5.** EDX quantification spectra for the entire surface (top) and subdivided sections (bottom) along with oxygen percentage in each region. The sample is a 100 nm tetracene thin film reacted for 8 h maleic anhydride and imaged at 1 keV electron energy.

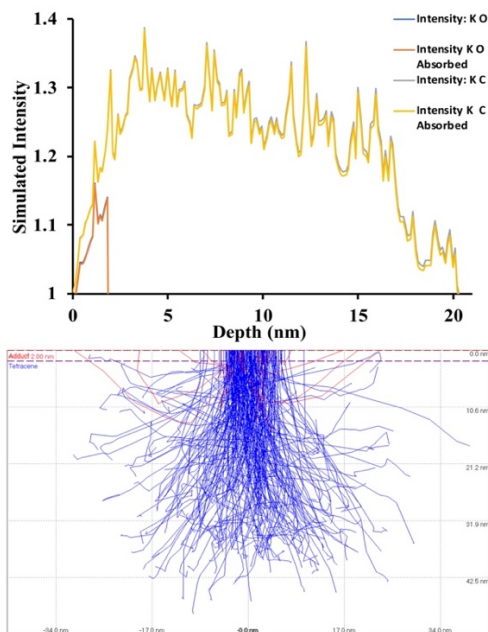

**Fig. S6.** Monte Carlo simulation model of X-ray penetration into a sample comprised of 2 nm of  $C_{22}O_3$  on top of 98 nm carbon. Top is emitted X-rays, while the bottom shows the electron trajectories in the sample.

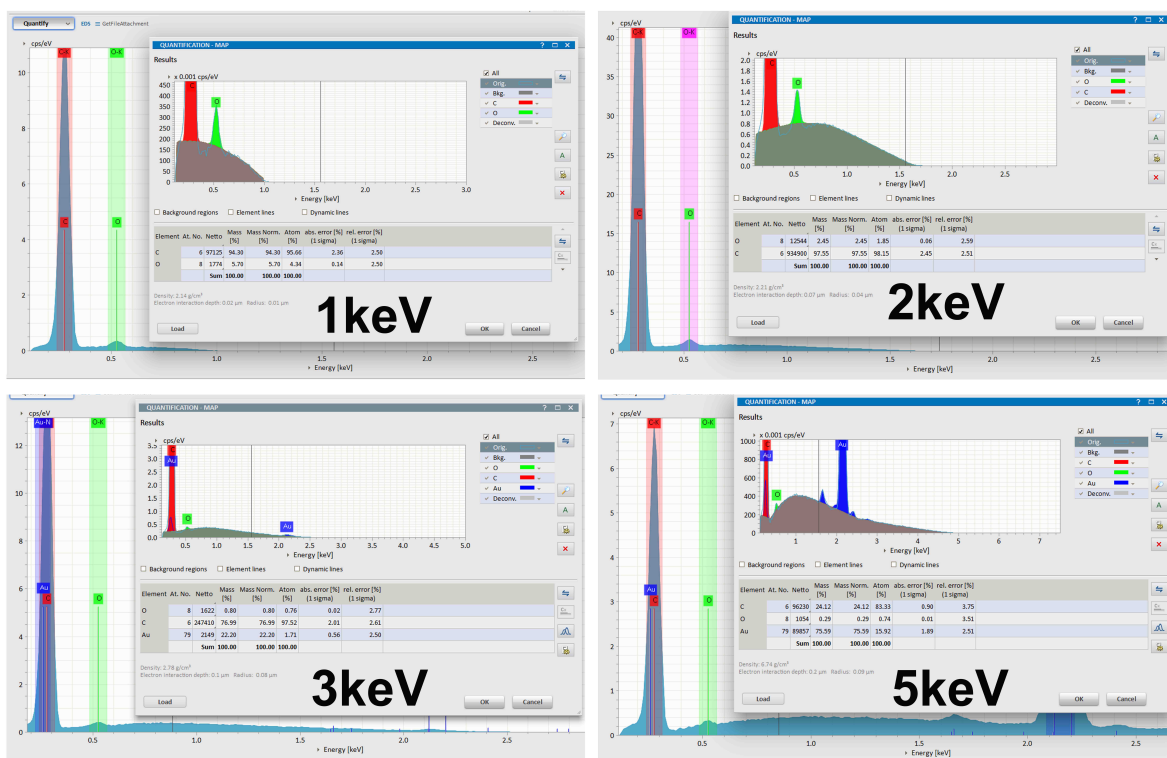

**Fig. S7.** EDX spectra and percentage oxygen of 100 nm tetracene thin films that have been reacted with maleic anhydride for 36 h imaged at 1-5 keV electron energy.

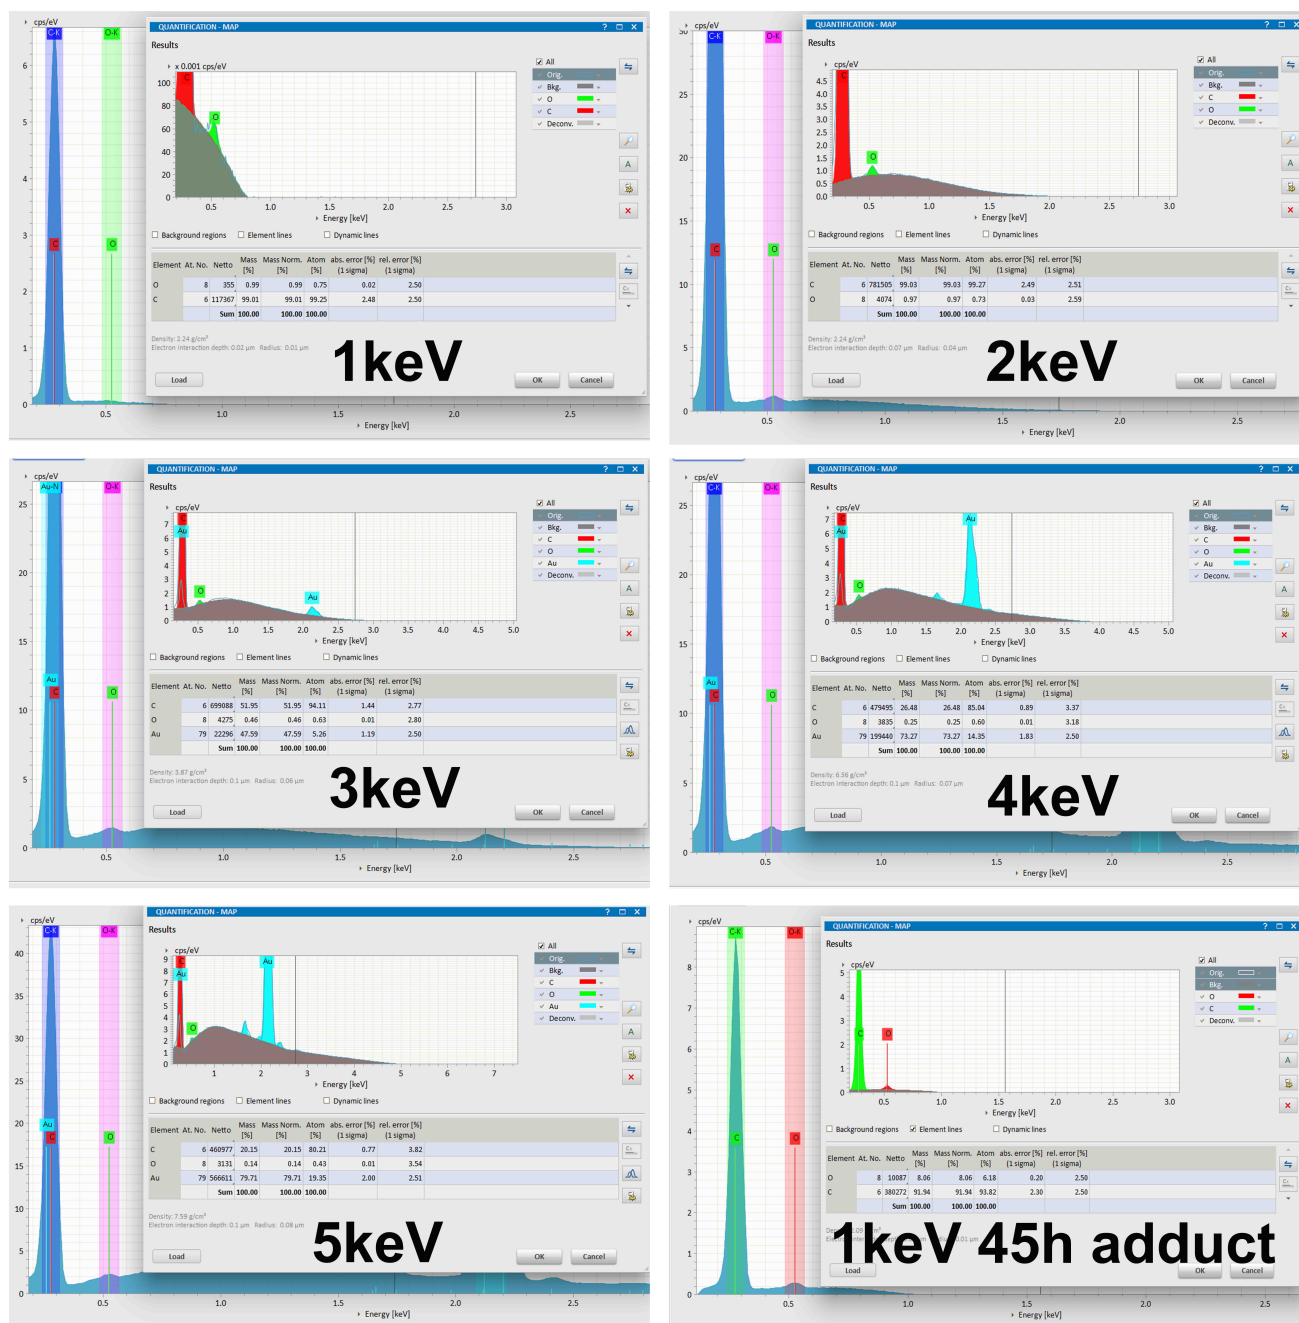

**Fig. S8.** EDX spectra and percentage oxygen of 100 nm tetracene thin films imaged at 1-5 keV electron energy. Bottom right image is EDX spectra and percentage oxygen of 100 nm tetracene thin film that has been reacted with maleic anhydride for 45 h imaged at 1 keV electron energy.

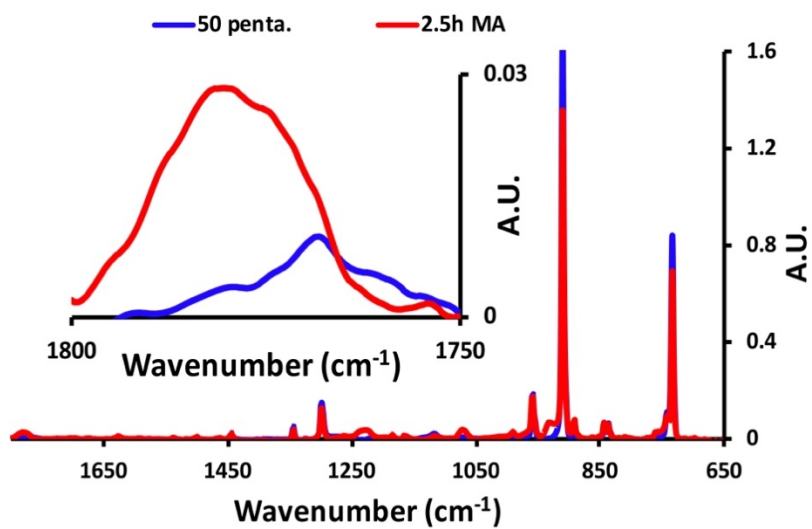

**Fig. S9.** PM-IRRAS spectra of a 50 nm pentacene thin film reacted with maleic anhydride. The colors denote the following: unreacted 50 nm pentacene (blue), 50 °C, 2.5 h reaction (red).
